# Supplementary material for: Incidence and Transition of Acute Kidney Injury, Acute Kidney Disease to Chronic Kidney Disease after Acute Type A Aortic Dissection Surgery
Source: MDPI journal article supplement (doi:10.3390/jcm10204769), 2021-10-18
Supplement: s1 [file s1]

**Supplementary Table S1.** Diagnoses used to define the cohorts, comorbidities, and outcomes

| Disease                               | ICD-9 CM disease code                                                                                                                  | ICD-10 CM disease code                                                                                                                                                                                                                              |
|---------------------------------------|----------------------------------------------------------------------------------------------------------------------------------------|-----------------------------------------------------------------------------------------------------------------------------------------------------------------------------------------------------------------------------------------------------|
| <b>Comorbidities</b>                  |                                                                                                                                        |                                                                                                                                                                                                                                                     |
| Marfan syndrome                       | 759.82                                                                                                                                 | Q87.4                                                                                                                                                                                                                                               |
| Diabetes mellitus                     | 250                                                                                                                                    | E08-E13                                                                                                                                                                                                                                             |
| Hypertension                          | 401 – 405                                                                                                                              | I10-I15, N262                                                                                                                                                                                                                                       |
| Dyslipidemia                          |                                                                                                                                        |                                                                                                                                                                                                                                                     |
| Chronic kidney disease                | 580 – 589, 403 – 404, 016.0, 095.4, 236.9 250.4, 274.1, 442.1, 447.3, 440.1, 572.4, 642.1, 646.2 753.1, 283.11, 403.01, 404.02, 446.21 | A1811, D593, E102, E112, E132, I12, I13, K767, M103, M310, N00, N01, N02, N03, N04, N05, N06, N07, N08, N14, N150, N158, N159, N16, N171, N172, N18, N19, N200, N25, N261, N269, N27, Q61                                                           |
| Old stroke                            | 430 – 437                                                                                                                              | I60-I62, I66, I65.1, I65.0, I65.8, I65.9, I63.6, I63.8, I63.9, G45.0, G45.8, G45.1, G45.2, G46.0, G46.1, G46.2, G45.9, G45.4, G46.3, G46.4, G46.5, G46.6, G46.7, G46.8, I67.0, I67.1, I67.2, I67.4, I67.5, I67.6, I67.7, I67.9, I68.0, I68.2, I68.8 |
| Chronic obstructive pulmonary disease | 491, 492, 496                                                                                                                          | J41-J44                                                                                                                                                                                                                                             |
| Coronary artery disease               | 410 – 414                                                                                                                              | I20-I24                                                                                                                                                                                                                                             |
| Atrial fibrillation                   | 427.3                                                                                                                                  | I48                                                                                                                                                                                                                                                 |
| Peripheral arterial disease           | 440, 441, 443, 444.0, 444.8, 447.8, 447.9, 093.0, 437.3, 444.22, 447.1, 557.1, 557.9, V434                                             | I70, I71, I73, I75, I771, I790, I791, I792, I773, I779, I798, K551, K558, K559, Z958, Z959, I743, I744, I745, I748, I740, I7789                                                                                                                     |
| <b>Outcomes</b>                       |                                                                                                                                        |                                                                                                                                                                                                                                                     |
| Respiratory failure                   | 518                                                                                                                                    | J96                                                                                                                                                                                                                                                 |

Ischemic stroke

433 – 437

I66, I65.1, I65.0, I65.8, I65.9, I63.6, I63.8, I63.9,  
G45.0, G45.8, G45.1, G45.2, G46.0, G46.1, G46.2,  
G45.9, G45.4, G46.3, G46.4, G46.5, G46.6, G46.7,  
G46.8, I67.0, I67.1, I67.2, I67.4, I67.5, I67.6, I67.7,  
I67.9, I68.0, I68.2, I68.8

---

**Supplementary Table S2.** Baseline and clinical characteristics of patients according to AKI or AKD

| Variables                             | Valid<br><i>N</i> | Total<br>( <i>n</i> = 696) | AKI<br>( <i>n</i> = 376) | Non-AKI<br>( <i>n</i> = 320) | <i>P</i><br>value | AKD<br>( <i>n</i> = 169) | Non-AKD<br>( <i>n</i> = 527) | <i>P</i><br>value |
|---------------------------------------|-------------------|----------------------------|--------------------------|------------------------------|-------------------|--------------------------|------------------------------|-------------------|
| AKI stage                             | 696               |                            |                          |                              | --                |                          |                              | <0.001            |
| 0                                     |                   | 320 (46.0)                 | 0 (0.0)                  | 320 (100.0)                  |                   | 34 (20.1)                | 286 (54.3)                   |                   |
| 1                                     |                   | 170 (24.4)                 | 170 (45.2)               | 0 (0.0)                      |                   | 31 (18.3)                | 139 (26.4)                   |                   |
| 2                                     |                   | 88 (12.6)                  | 88 (23.4)                | 0 (0.0)                      |                   | 29 (17.2)                | 59 (11.2)                    |                   |
| 3                                     |                   | 118 (17.0)                 | 118 (31.4)               | 0 (0.0)                      |                   | 75 (44.4)                | 43 (8.2)                     |                   |
| Demographics                          |                   |                            |                          |                              |                   |                          |                              |                   |
| Age, years                            | 696               | 57.6±13.7                  | 57.4±13.4                | 57.7±14.0                    | 0.774             | 57.5±13.3                | 57.6±13.8                    | 0.924             |
| Male gender                           | 696               | 472 (67.8)                 | 268 (71.3)               | 204 (63.8)                   | 0.034             | 116 (68.6)               | 356 (67.6)                   | 0.792             |
| Body weight, kg                       | 691               | 73.3±17.0                  | 75.8±18.6                | 70.4±14.5                    | <0.001            | 75.0±18.2                | 72.8±16.6                    | 0.148             |
| Height, cm                            | 669               | 164.5±14.6                 | 164.5±15.3               | 164.5±13.8                   | 0.990             | 163.1±17.3               | 164.9±13.6                   | 0.155             |
| BMI, kg/m <sup>2</sup>                | 669               | 25.9<br>[23.3, 29.4]       | 27.1<br>[24.6, 29.7]     | 25.2<br>[23.0, 28.4]         | <0.001            | 27.6<br>[24.7, 32.2]     | 25.5<br>[23.2, 28.5]         | 0.003             |
| Smoking                               | 696               | 272 (39.1)                 | 146 (38.8)               | 126 (39.4)                   | 0.883             | 63 (37.3)                | 209 (39.7)                   | 0.581             |
| Comorbidities                         |                   |                            |                          |                              |                   |                          |                              |                   |
| Marfan syndrome                       | 696               | 26 (3.7)                   | 11 (2.9)                 | 15 (4.7)                     | 0.222             | 5 (3.0)                  | 21 (4.0)                     | 0.540             |
| Diabetes mellitus                     | 696               | 54 (7.8)                   | 27 (7.2)                 | 27 (8.4)                     | 0.537             | 13 (7.7)                 | 41 (7.8)                     | 0.970             |
| Hypertension                          | 696               | 500 (71.8)                 | 264 (70.2)               | 236 (73.8)                   | 0.301             | 108 (63.9)               | 392 (74.4)                   | 0.008             |
| Dyslipidemia                          | 696               | 58 (8.3)                   | 34 (9.0)                 | 24 (7.5)                     | 0.463             | 20 (11.8)                | 38 (7.2)                     | 0.058             |
| Chronic kidney disease                | 696               | 76 (10.9)                  | 58 (15.4)                | 18 (5.6)                     | <0.001            | 36 (21.3)                | 40 (7.6)                     | <0.001            |
| Old stroke                            | 696               | 23 (3.3)                   | 13 (3.5)                 | 10 (3.1)                     | 0.807             | 4 (2.4)                  | 19 (3.6)                     | 0.433             |
| Chronic obstructive pulmonary disease | 696               | 29 (4.2)                   | 15 (4.0)                 | 14 (4.4)                     | 0.800             | 9 (5.3)                  | 20 (3.8)                     | 0.386             |

| Variables                     | Valid<br><i>N</i> | Total<br>( <i>n</i> = 696) | AKI<br>( <i>n</i> = 376) | Non-AKI<br>( <i>n</i> = 320) | <i>P</i><br>value | AKD<br>( <i>n</i> = 169) | Non-AKD<br>( <i>n</i> = 527) | <i>P</i><br>value |
|-------------------------------|-------------------|----------------------------|--------------------------|------------------------------|-------------------|--------------------------|------------------------------|-------------------|
| Coronary artery disease       | 696               | 60 (8.6)                   | 31 (8.2)                 | 29 (9.1)                     | 0.702             | 10 (5.9)                 | 50 (9.5)                     | 0.150             |
| Atrial fibrillation           | 696               | 49 (7.0)                   | 20 (5.3)                 | 29 (9.1)                     | 0.054             | 7 (4.1)                  | 42 (8.0)                     | 0.091             |
| Peripheral arterial disease   | 696               | 98 (14.1)                  | 48 (12.8)                | 50 (15.6)                    | 0.280             | 24 (14.2)                | 74 (14.0)                    | 0.959             |
| Pre-OP vital signs            |                   |                            |                          |                              |                   |                          |                              |                   |
| Mean arterial pressure, mmHg  | 695               | 89.4±19.0                  | 89.4±20.6                | 89.4±17.0                    | 0.977             | 89.7±21.3                | 89.3±18.2                    | 0.817             |
| Heart rate, beats/min         | 695               | 83.9±18.2                  | 84.4±19.1                | 83.3±17.1                    | 0.410             | 84.4±19.0                | 83.8±18.0                    | 0.712             |
| Pre-OP lab data               |                   |                            |                          |                              |                   |                          |                              |                   |
| Creatinine, mg/dL             | 696               | 1.29±1.00                  | 1.44±1.30                | 1.12±0.40                    | <0.001            | 1.58±1.59                | 1.20±0.70                    | <0.001            |
| BUN, mg/dL                    | 511               | 18.5±8.1                   | 19.5±9.2                 | 17.3±6.5                     | 0.003             | 20.5±9.8                 | 17.8±7.3                     | 0.001             |
| WBC, 10 <sup>3</sup> /uL      | 691               | 13.0±4.6                   | 13.3±4.6                 | 12.6±4.6                     | 0.033             | 12.5±4.5                 | 13.1±4.6                     | 0.118             |
| Hemoglobin, g/dL              | 691               | 13.5±2.0                   | 13.6±2.0                 | 13.3±1.9                     | 0.034             | 13.3±2.1                 | 13.5±1.9                     | 0.161             |
| Platelet, 10 <sup>3</sup> /uL | 691               | 179.6±59.4                 | 172.7±52.1               | 187.7±66.1                   | 0.001             | 174.3±53.4               | 181.2±61.1                   | 0.192             |
| Sodium (Na), mEq/L            | 682               | 139.1±3.4                  | 139.4±3.6                | 138.8±3.2                    | 0.023             | 139.0±3.8                | 139.2±3.3                    | 0.682             |
| Potassium (K), mEq/L          | 682               | 3.7±0.5                    | 3.7±0.6                  | 3.7±0.5                      | 0.949             | 3.7±0.6                  | 3.7±0.5                      | 0.978             |
| Surgical details              |                   |                            |                          |                              |                   |                          |                              |                   |
| Bypass time, min              | 579               | 253.5±69.5                 | 263.0±73.0               | 241.9±63.2                   | <0.001            | 268.7±89.5               | 248.5±60.9                   | 0.003             |
| Clamp time, min               | 576               | 162.0±53.1                 | 168.2±55.1               | 154.3±49.7                   | 0.002             | 170.5±64.9               | 159.2±48.5                   | 0.027             |
| Arrest time, min              | 571               | 50.1±24.2                  | 52.1±26.2                | 47.6±21.2                    | 0.025             | 51.3±27.4                | 49.7±23.0                    | 0.490             |
| HTK, cc                       | 260               | 2175.4±521.0               | 2180.6±517.9             | 2170.6±525.7                 | 0.877             | 2239.7±625.7             | 2156.9±487.0                 | 0.287             |
| Brain protection              | 696               |                            |                          |                              | 0.441             |                          |                              | 0.499             |
| Antegrade                     |                   | 374 (53.7)                 | 197 (52.4)               | 177 (55.3)                   |                   | 87 (51.5)                | 287 (54.5)                   |                   |
| Retrograde                    |                   | 322 (46.3)                 | 179 (47.6)               | 143 (44.7)                   |                   | 82 (48.5)                | 240 (45.5)                   |                   |
| Cerebral perfusion time, min  | 330               | 51.4±21.3                  | 53.7±23.3                | 48.8±18.6                    | 0.038             | 50.9±23.3                | 51.6±20.8                    | 0.812             |

| Variables                                      | Valid<br><i>N</i> | Total<br>( <i>n</i> = 696) | AKI<br>( <i>n</i> = 376) | Non-AKI<br>( <i>n</i> = 320) | <i>P</i><br>value | AKD<br>( <i>n</i> = 169) | Non-AKD<br>( <i>n</i> = 527) | <i>P</i><br>value |
|------------------------------------------------|-------------------|----------------------------|--------------------------|------------------------------|-------------------|--------------------------|------------------------------|-------------------|
| OR shock or tamponade                          | 696               | 87 (12.5)                  | 54 (14.4)                | 33 (10.3)                    | 0.107             | 19 (11.2)                | 68 (12.9)                    | 0.570             |
| Extension for type A surgery                   |                   |                            |                          |                              |                   |                          |                              |                   |
| Aortic arch replacement                        | 696               | 239 (34.3)                 | 140 (37.2)               | 99 (30.9)                    | 0.081             | 64 (37.9)                | 175 (33.2)                   | 0.267             |
| Aortic root replacement<br>(Bentall operation) | 696               | 54 (7.8)                   | 24 (6.4)                 | 30 (9.4)                     | 0.141             | 14 (8.3)                 | 40 (7.6)                     | 0.769             |
| Elephant trunk                                 | 696               | 20 (2.9)                   | 8 (2.1)                  | 12 (3.8)                     | 0.202             | 5 (3.0)                  | 15 (2.8)                     | 0.939             |
| Ascending aorta<br>replacement only            | 696               | 394 (56.6)                 | 210 (55.9)               | 184 (57.5)                   | 0.662             | 89 (52.7)                | 305 (57.9)                   | 0.234             |
| Post-OP status                                 |                   |                            |                          |                              |                   |                          |                              |                   |
| SOFA score                                     | 222               | 10.5±2.0                   | 10.7±2.0                 | 10.1±1.9                     | 0.023             | 11.0±2.2                 | 10.3±1.9                     | 0.033             |
| SOFA score, excluding total<br>bilirubin       | 476               | 9.8±1.9                    | 10.1±1.9                 | 9.5±1.8                      | <0.001            | 10.4±2.2                 | 9.6±1.7                      | <0.001            |
| Post-OP lab                                    |                   |                            |                          |                              |                   |                          |                              |                   |
| AST                                            | 493               | 77.0<br>[51.0, 142.0]      | 84.0<br>[52.0, 172.0]    | 70.0<br>[49.0, 106.0]        | 0.002             | 102.0<br>[54.0, 196.5]   | 72.0<br>[50.0, 121.0]        | 0.001             |
| ALT                                            | 421               | 46.0<br>[25.0, 98.0]       | 55.0<br>[24.0, 119.0]    | 37.0<br>[25.0, 74.0]         | 0.027             | 53.0<br>[25.0, 125.0]    | 44.0<br>[24.0, 90.5]         | 0.169             |
| Hemoglobin, g/dL                               | 696               | 10.9±1.6                   | 10.7±1.7                 | 11.1±1.5                     | <0.001            | 10.7±1.6                 | 10.9±1.6                     | 0.138             |
| Platelet, 10 <sup>3</sup> /uL                  | 696               | 136.1±43.4                 | 131.3±40.2               | 141.7±46.4                   | 0.002             | 129.7±39.9               | 138.2±44.3                   | 0.027             |
| Hospital stay                                  | 696               | 22.0 [15.0,<br>34.0]       | 26.0 [17.0,<br>43.0]     | 19.0 [14.0,<br>27.0]         | <0.001            | 33.0 [21.0,<br>60.0]     | 20.0 [14.0,<br>30.0]         | <0.001            |
| Follow-up years                                | 696               | 4.4±3.4                    | 4.7±3.6                  | 4.0±3.0                      | 0.004             | 4.3±3.7                  | 4.4±3.3                      | 0.766             |

Abbreviations: AKI, acute kidney injury; AKD, acute kidney disease; BMI, body mass index; OP, operation; BUN, blood urea nitrogen; WBC, white blood cells; OR, operation room; SOFA, Sequential Organ Failure Assessment; AST, aspartate aminotransferase; ALT, alanine aminotransferase.

**Supplementary Table S3.** The association of AKD with the risk of recurrent AKI and newly diagnosed CKD in the presence of ESRD as the competing risk

| Late outcomes (>90days) | AKD<br>(n = 169) | Non-AKD<br>(n = 527) | Unadjusted analysis  |         | Multivariable analysis† |         |
|-------------------------|------------------|----------------------|----------------------|---------|-------------------------|---------|
|                         |                  |                      | SHR (95% CI) for AKD | P value | SHR (95% CI) for AKD    | P value |
| Recurrent AKI           | 35 (20.7)        | 77 (14.6)            | 1.56 (1.04 - 2.33)   | 0.031   | 1.24 (0.77 - 2.00)      | 0.386   |
| Newly-diagnosed CKD     | 93 (55.0)        | 201 (38.1)           | 1.94 (1.48 - 2.53)   | <0.001  | 2.86 (2.10 - 3.89)      | <0.001  |

**Abbreviations:** AKD, acute kidney disease; AKI, Acute kidney injury; SHR, subdistribution hazard ratio; CI, confidence interval; CKD, chronic kidney disease; ESRD, end-stage renal disease; † Adjusted with AKI stage, age, gender, body mass index, smoking, diabetes mellitus, hypertension, chronic kidney disease, coronary artery disease, mean arterial pressure, pre-operation creatinine, pre-operation hemoglobin, bypass time, shock at operation room, extensions for type A surgery.

**Supplementary Table S4.** The associated factors of AKI and AKD using the multivariable logistic regression analysis with backward elimination

| Outcome / Variable                          | Adjusted OR (95% CI)  | P value |
|---------------------------------------------|-----------------------|---------|
| AKI#                                        |                       |         |
| Chronic kidney disease                      | 2.20 (1.22 - 3.98)    | 0.009   |
| Creatinine, mg/dL                           | 1.88 (1.30 - 2.72)    | <0.001  |
| Hemoglobin, g/dL                            | 1.14 (1.05 - 1.24)    | 0.003   |
| Bypass time, min                            | 1.005 (1.003 - 1.008) | <0.001  |
| Aortic root replacement (Bentall operation) | 0.41 (0.22 - 0.77)    | 0.006   |
| AKD*                                        |                       |         |
| AKI stage (Reference: Stage 0)              |                       |         |
| 1                                           | 1.91 (1.12 - 3.25)    | 0.018   |
| 2                                           | 4.14 (2.33 - 7.33)    | <0.001  |
| 3                                           | 13.97 (8.15 - 23.92)  | <0.001  |
| Chronic kidney disease                      | 1.73 (0.96 - 3.09)    | 0.066   |
| Hemoglobin, g/dL                            | 0.91 (0.82 - 1.01)    | 0.070   |

AKI, acute kidney injury; AKD, acute kidney disease; OR, odds ratio; CI, confidence interval;  
# Variables included in backward selection logistic model with age, gender, body mass index, smoking, diabetes mellitus, hypertension, chronic kidney disease, coronary artery disease, mean arterial pressure, pre-operation creatinine, pre-operation hemoglobin, bypass time, shock at operation room, extensions for type A surgery;

\* Variables included in backward selection logistic model with AKI stage, age, gender, body mass index, smoking, diabetes mellitus, hypertension, chronic kidney disease, coronary artery disease, mean arterial pressure, pre-operation creatinine, pre-operation hemoglobin, bypass time, shock at operation room, extensions for type A surgery.
